# Supplementary material for: Real-imaging cDNA-AFLP transcript profiling of pancreatic cancer patients: Egr-1 as a potential key regulator of muscle cachexia
Source: PubMed Central journal article supplement (PMC3465185; doi:10.1186/1471-2407-12-265), 2012-06-21
Supplement: 1471-2407-12-265-S3.pdf [file 1471-2407-12-265-S3.pdf]

Figure S2

cDNA-AF

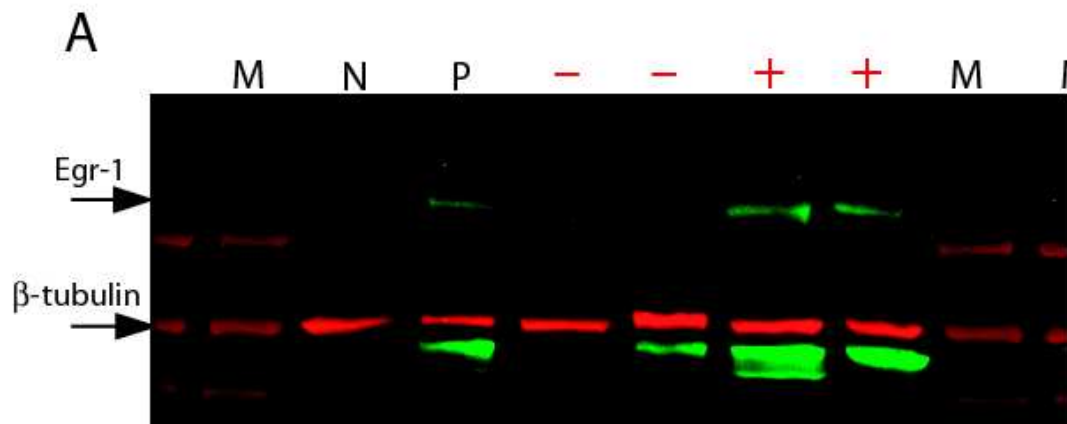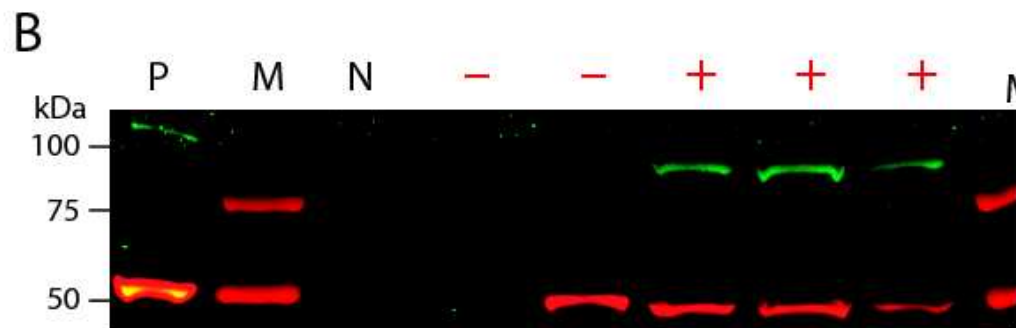

M - coomassie-blue prestained protein marker (Bio-RAD)  
P - positive control (3T3 cell lysate, Santa Cruz)  
N - negative control (293T cell lysate, Santa Cruz)  
"- " - no cachexia (biopsy protein lysate)  
"+ " - cachexia (biopsy protein lysate)
